# Supplementary material for: Electrophilic molecule-induced π–π interactions reduce energy disorder of the hole transport layer for highly efficient perovskite solar modules
Source: Royal Society of Chemistry journal article supplement (doi:10.1039/d4ee03173c), 2024-01-01
Supplement: d4ee03173c1.pdf [file d4ee03173c1.pdf]

## Supporting Information

### Electrophilic Molecule-Induced $\pi$ - $\pi$ Interactions Reduce Energy Disorder of Hole Transport Layer for Highly Efficient Perovskite Solar Modules

Lei Wang<sup>1</sup>, Shihao Yuan<sup>1,\*</sup>, Feng Qian<sup>1</sup>, Ting Zhang<sup>1</sup>, Hualin Zheng<sup>2</sup>, Xiaobo Li<sup>1</sup>,  
Tianyu Lan<sup>1</sup>, Qien Xu<sup>1</sup>, Peng Zhang<sup>3</sup>, Shibin Li<sup>1,\*</sup>

<sup>1</sup>School of Optoelectronic Science and Engineering, University of Electronic Science and Technology of China, Chengdu 610054, China.

<sup>2</sup>College of Optoelectronic Engineering, Chengdu University of Information Technology, Chengdu 610225, China

<sup>3</sup>College of Optical and Electronic Technology, China Jiliang University, Hangzhou 310018, China

\*Correspondence: [yuanshihao@uestc.edu.cn](mailto:yuanshihao@uestc.edu.cn), [shibinli@uestc.edu.cn](mailto:shibinli@uestc.edu.cn)

#### Experimental Section

**Materials:** All chemicals and solvents were used as received without further purification. Formamidinium hydroiodide (FAI, 99.9%), cesium iodide (CsI, 99.999%), lead (II) iodide (PbI<sub>2</sub>, 99.999%), lead (II) bromide (PbBr<sub>2</sub>, 99.99%), Methylammonium Chloride (MACl, 99.9%), [4-(3,6-dimethyl-9H-carbazol-9-yl)butyl]phosphonic acid (Me-4PACZ) and bathocuproine (BCP) were purchased from Xi'an Polymer Light Technology corp. C<sub>60</sub> was purchased from Luminescence Technology Corp. Chlorobenzene (CB, anhydrous, 99.8%) was obtained from Advanced Election Technology CO., Ltd. Dimethylformamide (DMF, 99.8%), 1-Methyl-2-pyrrolidinone

(NMP, 99%), 2,6-Difluorobenzonitrile (FCN), 2,4-Difluoronitrobenzene (FNO<sub>2</sub>) and 2,6-Difluoro-3-nitrobenzonitrile (FCNO<sub>2</sub>) were purchased from Sigma-Aldrich.

**Device Fabrication:** ITO glass substrates were cleaned with acetone, deionized water and anhydrous ethanol successively, and each ultrasonic cleaning time was 15min. For preparation of hole transport layer (HTL) NiO<sub>x</sub>, the NiO<sub>x</sub> layer was radio-frequency (RF)-sputtered onto the pre-cleaned ITO glass substrates (ultraviolet ozone treatment for 20 min) at room temperature with a chamber pressure of 0.37Pa, RF power of 200 W, argon flow rate of 100 sccm for 30 min. The sputtered NiO<sub>x</sub> films were annealed at 300 °C for 30 min under ambient conditions. The PTAA modified layer was formed by doping FCN, FNO<sub>2</sub> and FCNO<sub>2</sub> molecules (0-0.3 mg/ml) into PTAA (1 mg/mL in chlorobenzene) to form a mixed solution, which was then spin-coated onto the NiO<sub>x</sub> substrate at 4000 rpm for 30 s. For Cs<sub>0.05</sub>FA<sub>0.95</sub>Pb(Br<sub>0.05</sub>I<sub>0.95</sub>)<sub>3</sub> perovskite films, 1.6 M perovskite precursor solution was prepared by dissolving FAI, PbI<sub>2</sub>, CsI, PbBr<sub>2</sub> and MACl (0.3 mmol) in mixed solvents of DMF and NMP (v/v: 6:1). The filtered perovskite precursor solution was spin-coated on substrates at 4500 rpm for 7 s, and then the perovskite wet film was quickly transferred to the sample chamber connected to the vacuum pump. The vacuum pump was turned on, and the perovskite film was immediately exposed to a low pressure of 10 Pa for 25 seconds. Subsequently, the resulting perovskite films were annealed at 100 °C for 20 min in air. Then, C<sub>60</sub> (30 nm), BCP (6 nm) were sequentially thermally evaporated onto the perovskite films in a vacuum chamber (< 5×10<sup>-4</sup> Pa). Finally, a 100 nm Cu electrode was thermally evaporated on the BCP film.

For the  $10 \times 10 \text{ cm}^2$  solar module, the FTO cleaning process is the same as above, the red laser of 1064 nm was used to scribe the  $10 \times 10 \text{ cm}^2$  FTO substrate to form 11 strips (P1). The preparation of  $\text{NiO}_x$  layer is consistent with the method of small device. The  $\text{FCNO}_2$ -incorporated PTAA layer was blade-coated with a blade gap of 180  $\mu\text{m}$  above the  $\text{NiO}_x$  layer at a speed of 20 mm/s or the  $\text{FCNO}_2$ -incorporated Me-4PACZ layer (1mg/mL in anhydrous ethanol) was blade-coated with a blade gap of 180  $\mu\text{m}$  above the  $\text{NiO}_x$  layer at a speed of 40 mm/s. For  $\text{Cs}_{0.05}\text{FA}_{0.95}\text{Pb}(\text{Br}_{0.05}\text{I}_{0.95})_3$  perovskite films, 1 M perovskite precursor solution was coated on HTL substrate by slot-die method with a gap between the slip and the coated substrate of 200  $\mu\text{m}$ , a feed pump speed of 0.6  $\mu\text{l/s}$ , and a substrate moving speed of 6000  $\mu\text{m/s}$ . The perovskite wet film was quickly transferred to the sample chamber connected to the vacuum pump. The vacuum pump was turned on, and the perovskite film was immediately exposed to a low pressure of 10 Pa for 40 seconds. Subsequently, the resulting perovskite films were annealed at 100  $^\circ\text{C}$  for 25 min in air. Then,  $\text{C}_{60}$  (55 nm), BCP (8.5 nm) were sequentially thermally evaporated onto the perovskite films in a vacuum chamber ( $< 5 \times 10^{-4}$  Pa) and a green laser of 532 nm (P2) was used to etched the obtained perovskite/ $\text{C}_{60}$ /BCP films. Finally, a 200 nm Cu electrode was thermally evaporated on the BCP film in a vacuum chamber ( $< 3 \times 10^{-4}$  Pa) and the Cu electrode was divided by the green laser of 532 nm with a line width of 350  $\mu\text{m}$  (P3). The modules fabricated on  $10 \times 10 \text{ cm}^2$  perovskite solar modules with an effective area of 57.3  $\text{cm}^2$  contain 11 series connected cells with a GFF of 89%.

**Characterizations.** The temperature dependence of hole mobility was measured by using a Keithley 4200-SCS semiconductor parameter analyzer. Fourier Transform Infrared (FT-IR) spectroscopy was recorded using a Thermo Fisher Scientific Nicolet iS50 in a wavelength range of 4000 to 650  $\text{cm}^{-1}$ . Raman spectra were measured on a Horiba HR Evolution in a wavelength range of 2000 to 150  $\text{cm}^{-1}$ . Photoluminescence (PL) spectra and Time-resolved photoluminescence (TRPL) were acquired by employing the FLS980 Series of Fluorescence Spectrometers with an excitation wavelength of 480 nm. The UPS spectra were performed using Escalab 250Xi. X-ray photoelectron spectra (XPS) measurements were carried out on ESCALAB 250Xi. The roughness of films was measured using S NEOX 090 and contact angles of HTL films were measured using XG-CAMA1. The X-ray diffraction (XRD) was conducted using an X-ray diffractometer (Ultima IV) with Cu  $K\alpha$  radiation ( $\lambda=1.54 \text{ \AA}$ ) at a scan speed of  $5^\circ \text{ min}^{-1}$ . The Scanning Electron Microscopy (SEM) images and energy-dispersive spectroscopy (EDS) mapping were obtained via the field-emission scanning electron microscope (JEOL 7610F) using secondary electrons. Electrochemical impedance spectroscopy (EIS) was measured on an Electrochemical Workstation (China) and the data were processed using Z-View program.  $J-V$  curves of the perovskite solar cells were measured with a Keithley 2400 source meter under simulated solar illumination at  $100 \text{ mW cm}^{-2}$ , AM 1.5G standard air mass sunlight (Newport, Oriel Class A, 91195A), with anti-reflecting coating layers applied. The simulated light intensity was calibrated by a Si-reference cell.  $J-V$  curves were measured by reverse scan (from 1.2 V to -0.1 V) and forward scan (from -0.1 V to 1.2 V), where the scanning rate is 0.1V/s.

The black metal mask was used to define the effective active area of devices ( $0.08 \text{ cm}^2$ ). The module  $J$ - $V$  curves were measured under the same environmental conditions, and the scan voltage changed to 13 V for 11 sub-cells modules, where the scanning rate is 0.8 V/s. External quantum efficiency (EQE) were characterized under monochromatic illumination (Oriel Cornerstone 260 1/4 m monochromator equipped with an Oriel 70613NS QTH lamp, Enlitech Co., Ltd). The steady-state power conversion efficiency was calculated by measuring the stable photocurrent density at a constant bias voltage ( $V_{\text{max}}$  point).

### Supplementary Note 1

#### The hole mobility calculation method

The hole mobility is calculated by fitting the  $J$ - $V$  curve using the Mott-Gurney law.

$$J = \frac{9\varepsilon_0\varepsilon_r V^2}{8L^3} \quad (1)$$

where  $J$  represents the current density,  $\varepsilon_0$  represents the vacuum permittivity,  $\varepsilon_r$  represents the dielectric constant of the NiO<sub>x</sub>/PTAA,  $V$  represents the voltage applied to the device, and  $L$  represents the thickness of the NiO<sub>x</sub>/PTAA layer.

### Supplementary Note 2

#### The extent of density-of-states (DOS) calculation method

The extent of DOS is calculated by Gaussian fitting of the low-energy edge in the UPS results. Among them, the measured width  $\sigma'_{UPS}$  is the convolution of the intrinsic HOMO width of the material ( $\sigma_{UPS}$ ) and the instrument broadening factor ( $\sigma_{INS}$ ), which can be described as  $\sigma'_{UPS} = \sqrt{\sigma_{UPS}^2 + \sigma_{INS}^2}$ . In this paper,  $\sigma_{INS}$  is determined by measuring the Fermi edge of clean Ag, and thus, by decoupling  $\sigma_{INS}$ , the HOMO width of each HTL is derived.

### Supplementary Note 3

#### The conductivity calculation method

The conductivity is calculated by fitting the  $I$ - $V$  curves using the Drude model.

$$\sigma_c = \frac{d}{AR} \quad (2)$$

where  $\sigma_c$  represents the conductivity,  $d$  represents the thickness of the NiO<sub>x</sub>/PTAA layer,  $A$  represents the active area of device and  $R$  represents the resistance

obtained from the  $I$ - $V$  curve of device.

#### Supplementary Note 4

The method for calculating defect density and hole mobility via space charge limited current (SCLC) characterization.

In the  $I$ - $V$  characterization curve, the low bias region is the ohmic region, the medium bias region is the defect filling limit region, and the high bias region is the SCLC region. The boundary between the low bias region and the medium bias region is the defect filling limit voltage ( $V_{TFL}$ ), and the defect density ( $N_t$ ) is obtained by Eq.

3.

$$N_t = \frac{2\varepsilon\varepsilon_0V_{TFL}}{eL^2} \quad (3)$$

Where  $\varepsilon$  is the vacuum permittivity,  $\varepsilon_0$  is the relative permittivity of the perovskite,  $e$  is the electron charge, and  $L$  is the thickness of the perovskite film.

The carrier mobility can be calculated from the SCLC area according to the Mott-Gurney law in Eq. 1.

#### Supplementary Note 5

The basic formula for conductivity in P-type semiconductors is shown in Eq. 4.

$$\sigma_c = p \times q \times \mu_p \quad (4)$$

where  $\sigma_c$  represents the conductivity,  $p$  represents the hole concentration,  $q$  represents the charge of the electron and  $\mu_p$  represents the hole mobility.

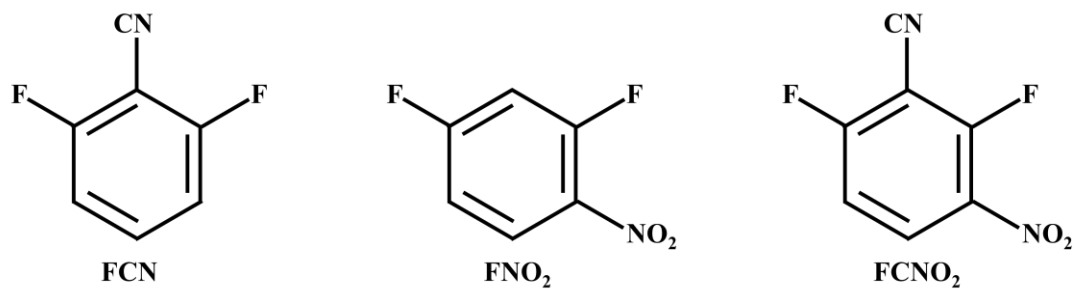

**Figure S1.** Chemical structure and of FCN, FNO<sub>2</sub>, FCNO<sub>2</sub> molecules.

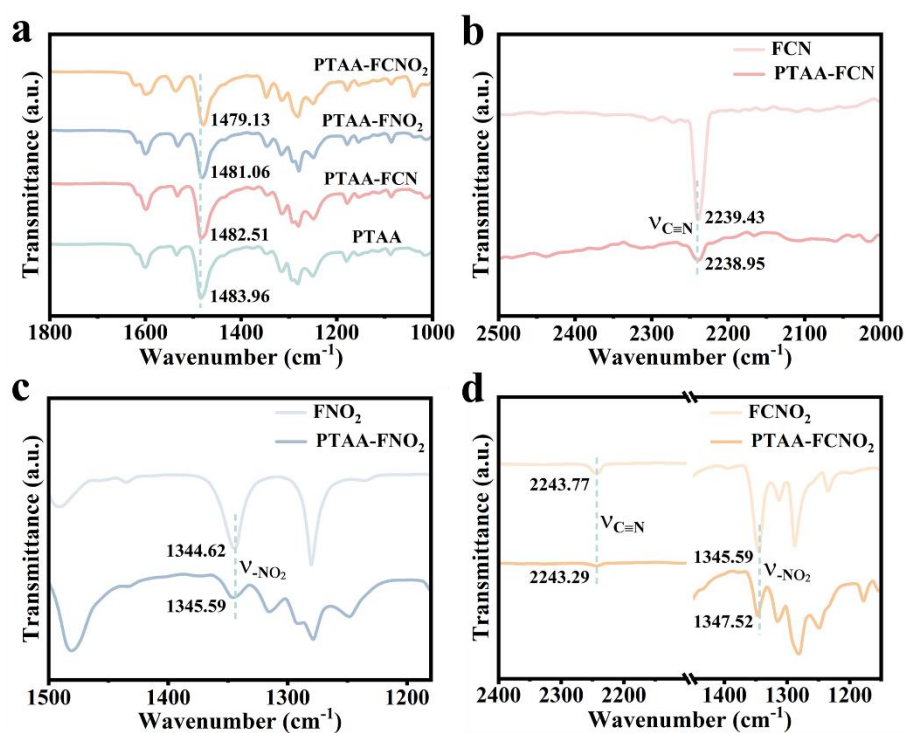

**Figure S2.** a) FT-IR spectra of PTAA and PTAA incorporated with FCN, FNO<sub>2</sub> and FCNO<sub>2</sub>.

FT-IR spectra of b) FCN and FCN-incorporated PTAA, c) FNO<sub>2</sub> and FNO<sub>2</sub>-

incorporated PTAA and d) FCNO<sub>2</sub> and FCNO<sub>2</sub>-incorporated PTAA.



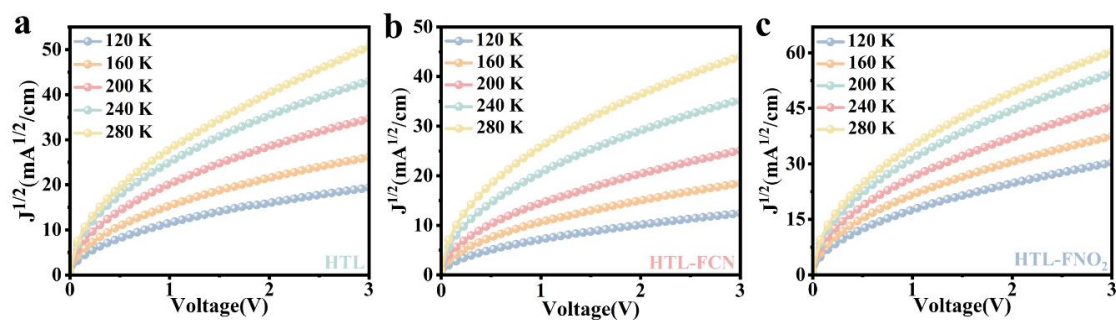

**Figure S3.** Hole mobility characterizations of a) pristine HTL, b) FCN-incorporated HTL and c) FNO<sub>2</sub>-incorporated HTL at different temperatures

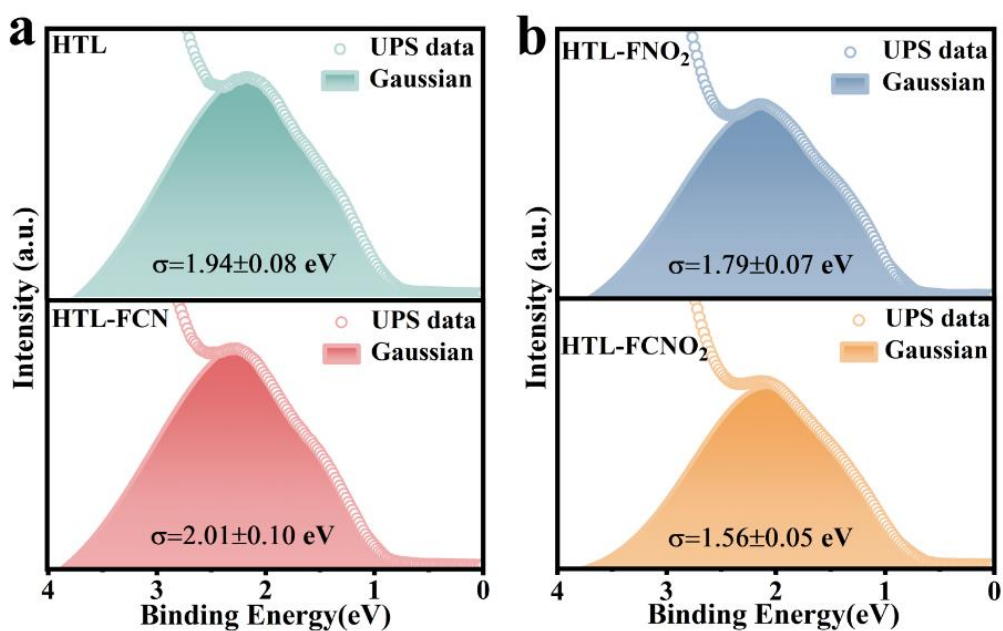

**Figure S4.** Gaussian fitting of the HOMO energy levels of (a) pristine HTL and FCN-incorporated HTL, (b) FNO<sub>2</sub>-incorporated HTL and FCNO<sub>2</sub>-incorporated HTL

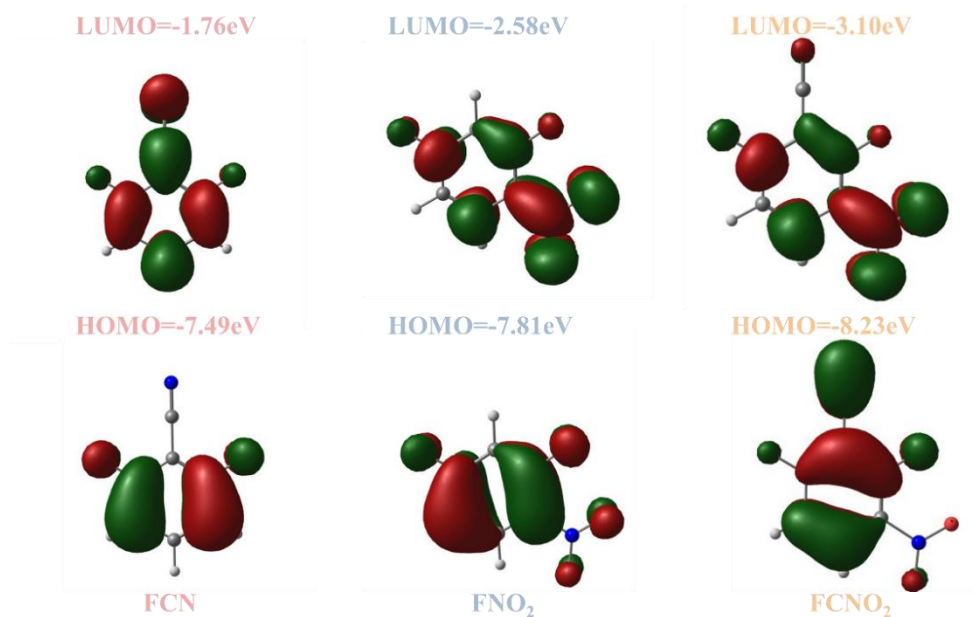

**Figure S5.** Schematic of LUMO and HOMO of a) FCN, b) FNO<sub>2</sub>, c) FCNO<sub>2</sub> molecules, calculated by DFT (B3LYP, 6-31G\*).

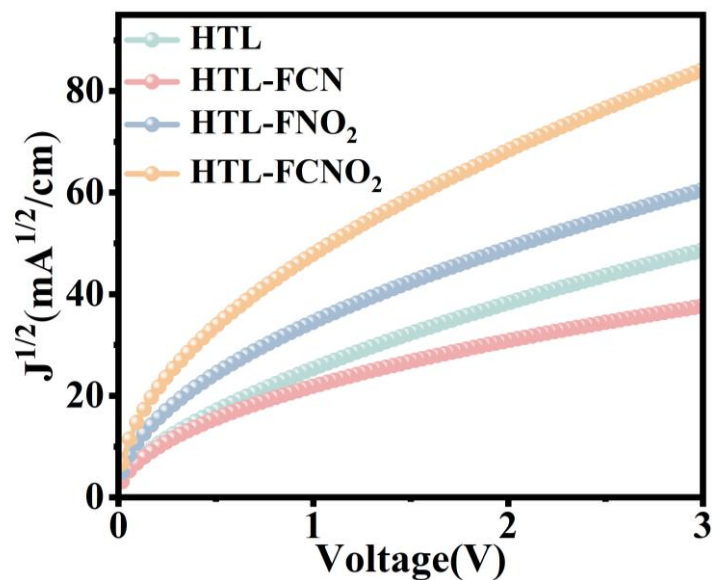

**Figure S6.** Hole mobility of pristine HTL, FCN-incorporated HTL, FNO<sub>2</sub>-incorporated HTL and FCNO<sub>2</sub>-incorporated HTL.

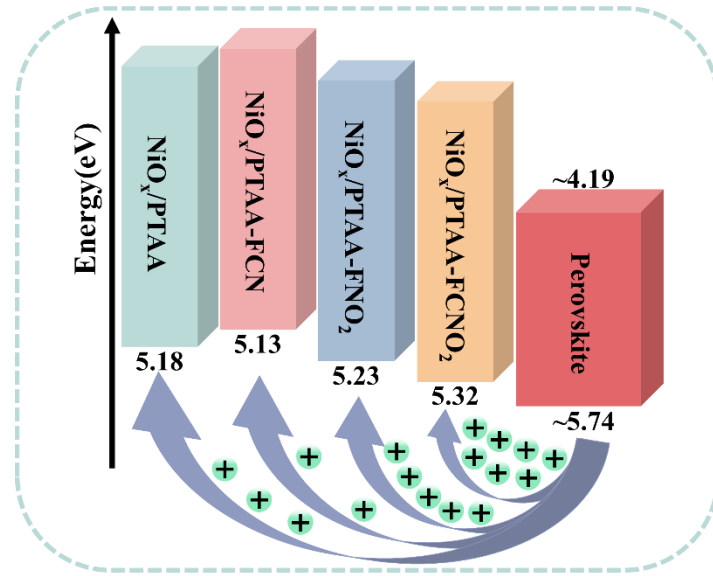

**Figure S7.** Schematic diagram of hole injection from perovskite into HTL.

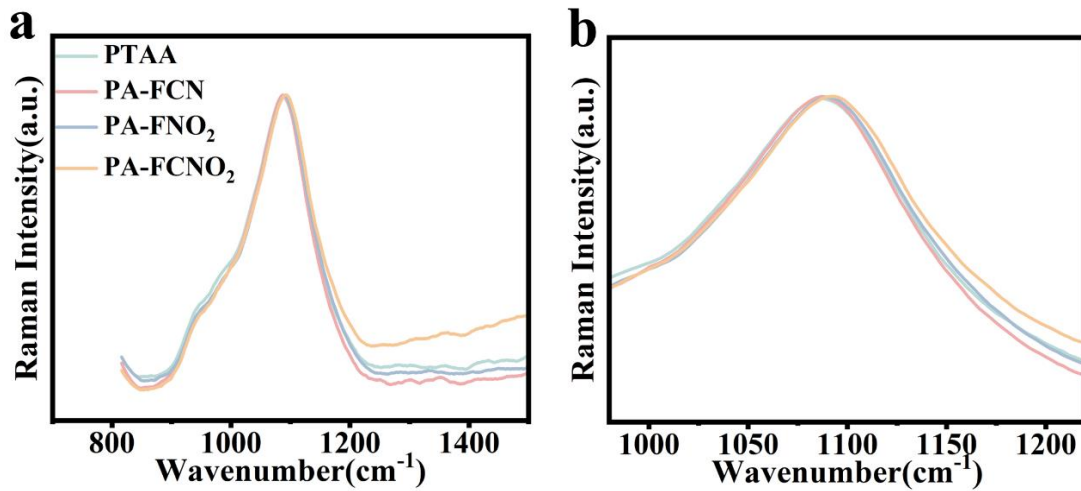

**Figure S8.** a) Raman spectra of PTAA, FCN-incorporated PTAA, FNO<sub>2</sub>-incorporated PTAA and FCNO<sub>2</sub>-incorporated PTAA at 1100 cm<sup>-1</sup>. b) Locally enlarged Raman spectra at

1100 cm<sup>-1</sup>. (PA refers to PTAA)

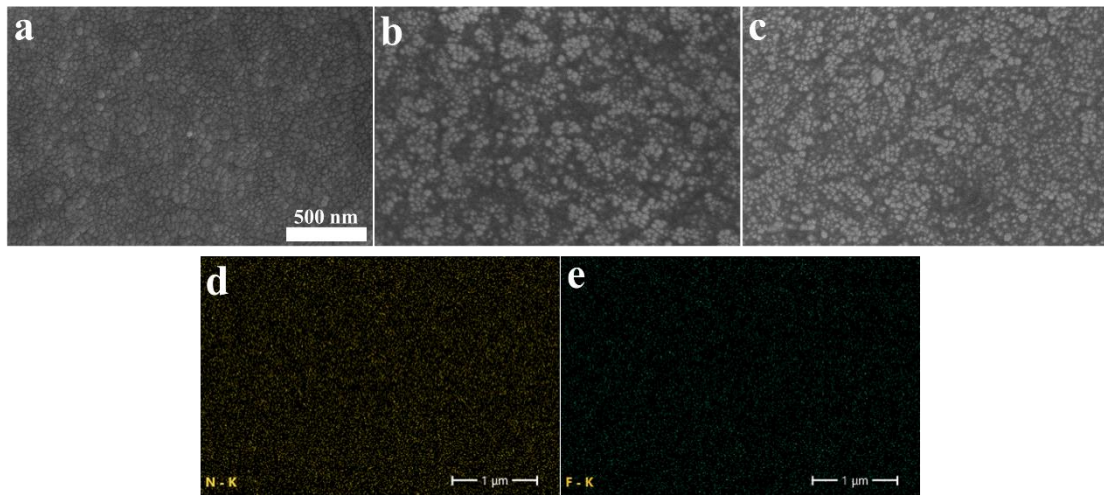

**Figure S9.** SEM images of a) NiO<sub>x</sub> film, b) NiO<sub>x</sub>/PTAA film and c) FCNO<sub>2</sub>-incorporated NiO<sub>x</sub>/PTAA film. The element mapping analysis of FCNO<sub>2</sub>-incorporated NiO<sub>x</sub>/PTAA film: d) N and e) F.

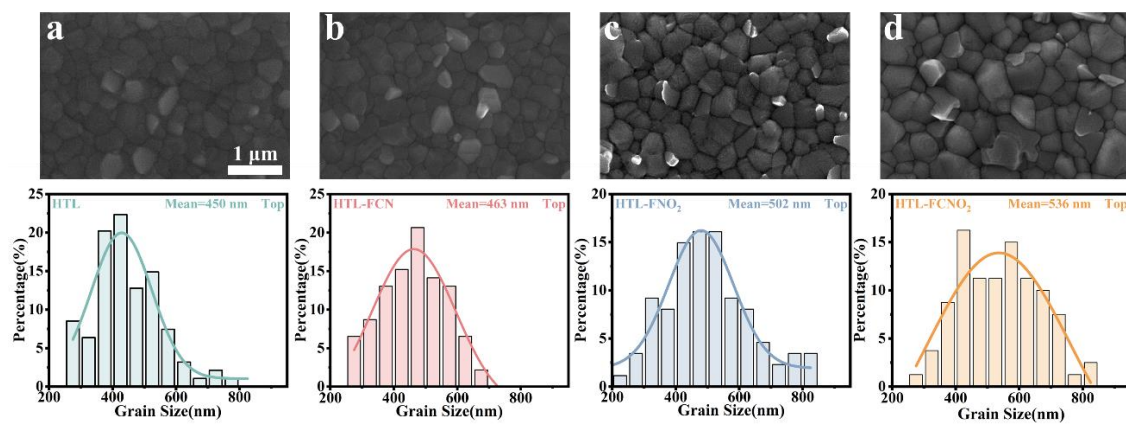

**Figure S10.** Top-view SEM images and Histogram of grain size distribution of perovskite films deposited on a) HTL, b) FCN-incorporated HTL, c) FNO<sub>2</sub>-incorporated HTL and d) FCNO<sub>2</sub>-incorporated HTL.

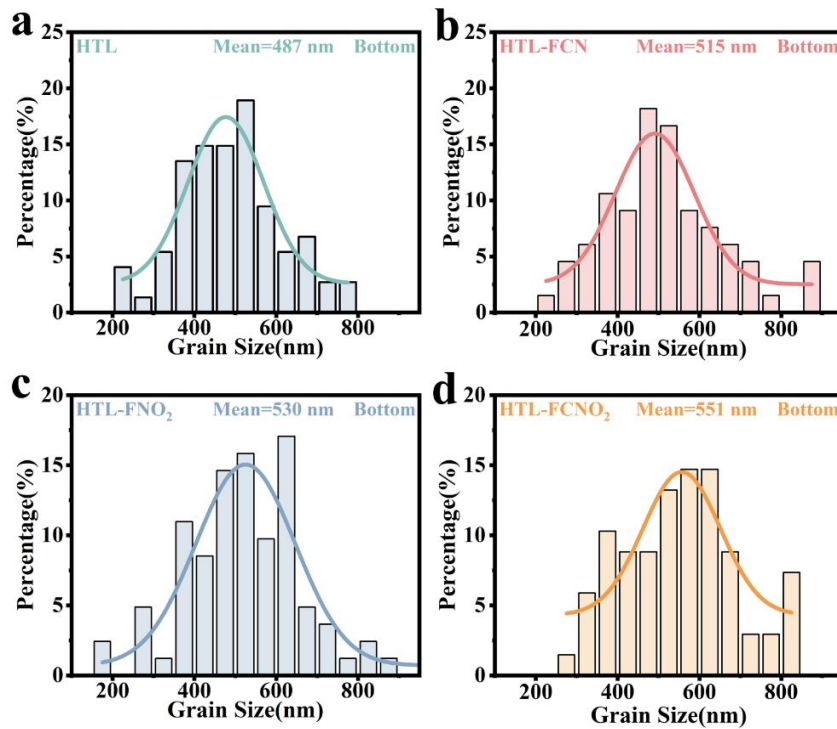

**Figure S11.** Histogram of grain size distribution corresponding to bottom surface SEM of perovskite films deposited on a) HTL, b) FCN-incorporated HTL, c) FNO<sub>2</sub>-incorporated HTL and d) FCNO<sub>2</sub>-incorporated HTL.

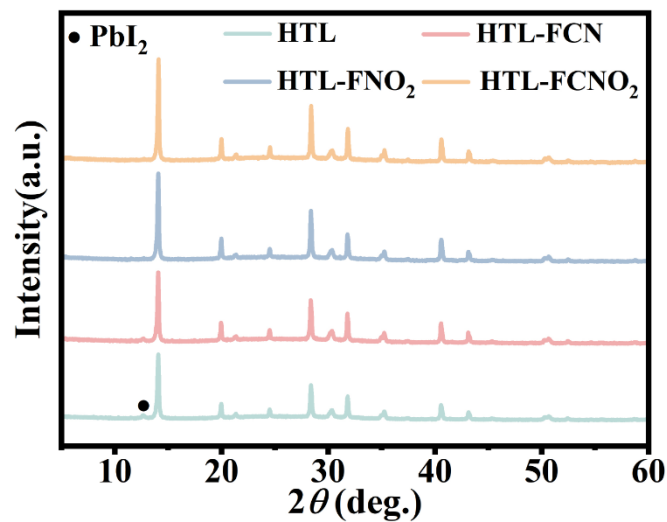

**Figure S12.** XRD patterns of the perovskite films deposited on HTL, FCN-incorporated HTL, FNO<sub>2</sub>-incorporated HTL and FCNO<sub>2</sub>-incorporated HTL

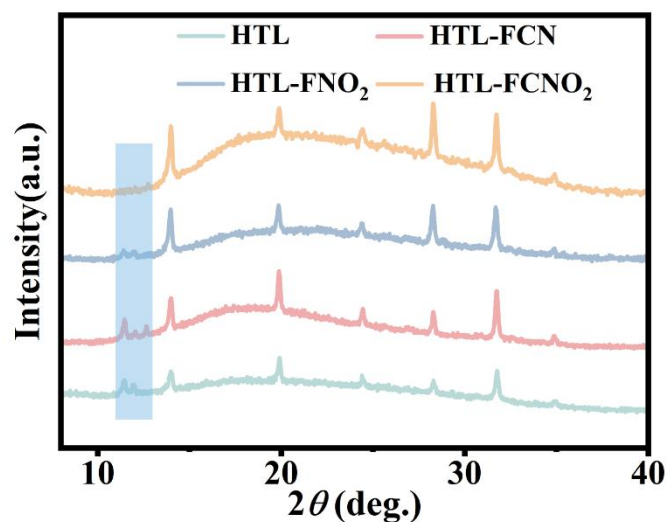

Figure S13. Bottom surface XRD patterns of perovskite films deposited on HTL, FCN-incorporated HTL, FNO<sub>2</sub>-incorporated HTL and FCNO<sub>2</sub>-incorporated HTL.

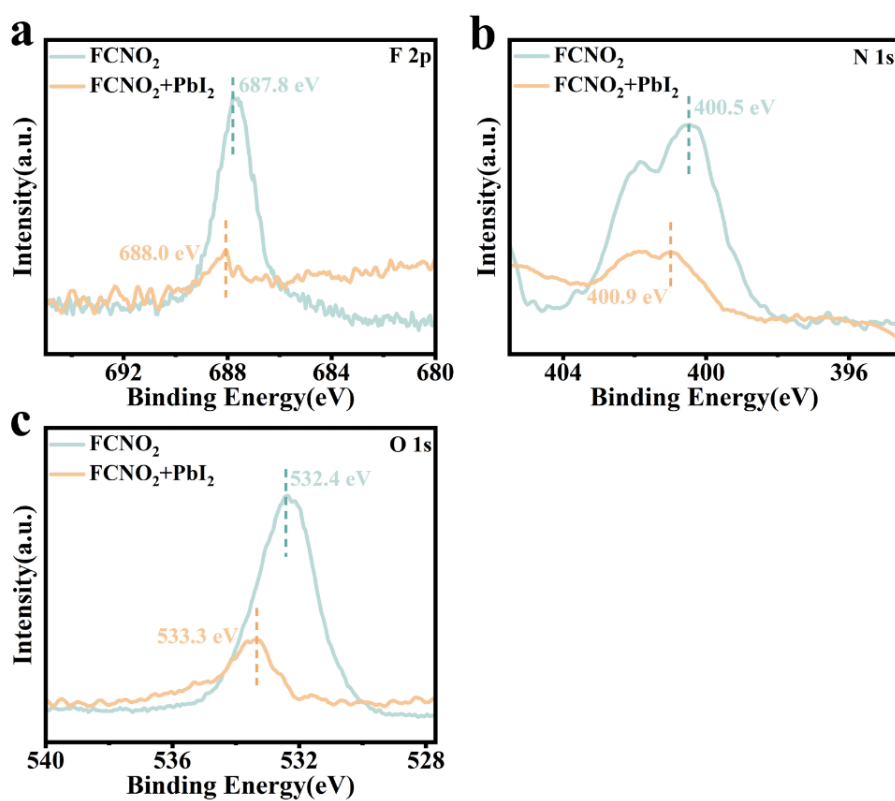

Figure S14. XPS of a) F 2p, b) N 1s and c) O 1s for FCNO<sub>2</sub> and FCNO<sub>2</sub>+PbI<sub>2</sub>.



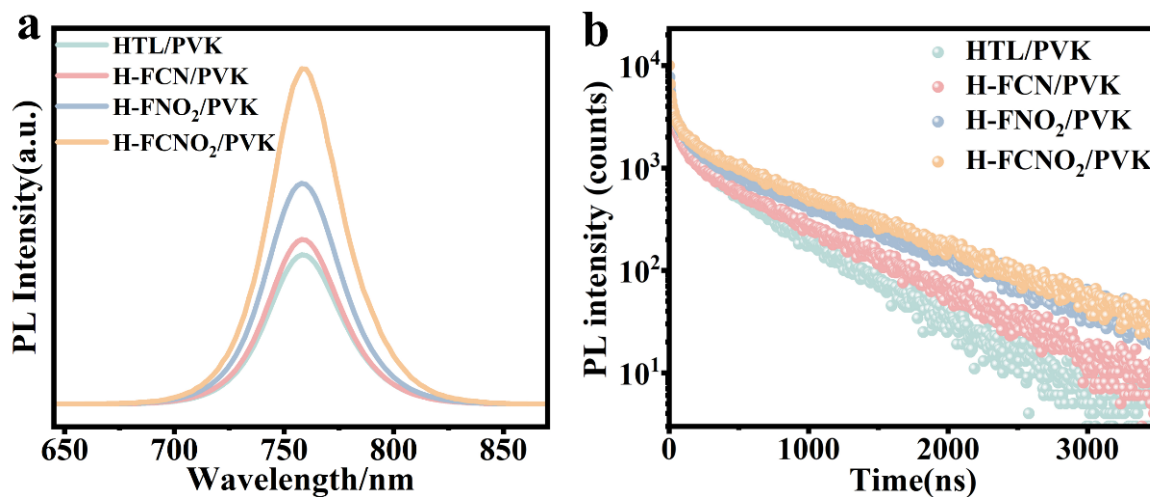

**Figure S15.** a) Steady-state PL spectra and b) time-resolved PL spectra of perovskite films deposited on different types of HTLs, irradiating fluorescence from the side of the perovskite film. (H refers to HTL)

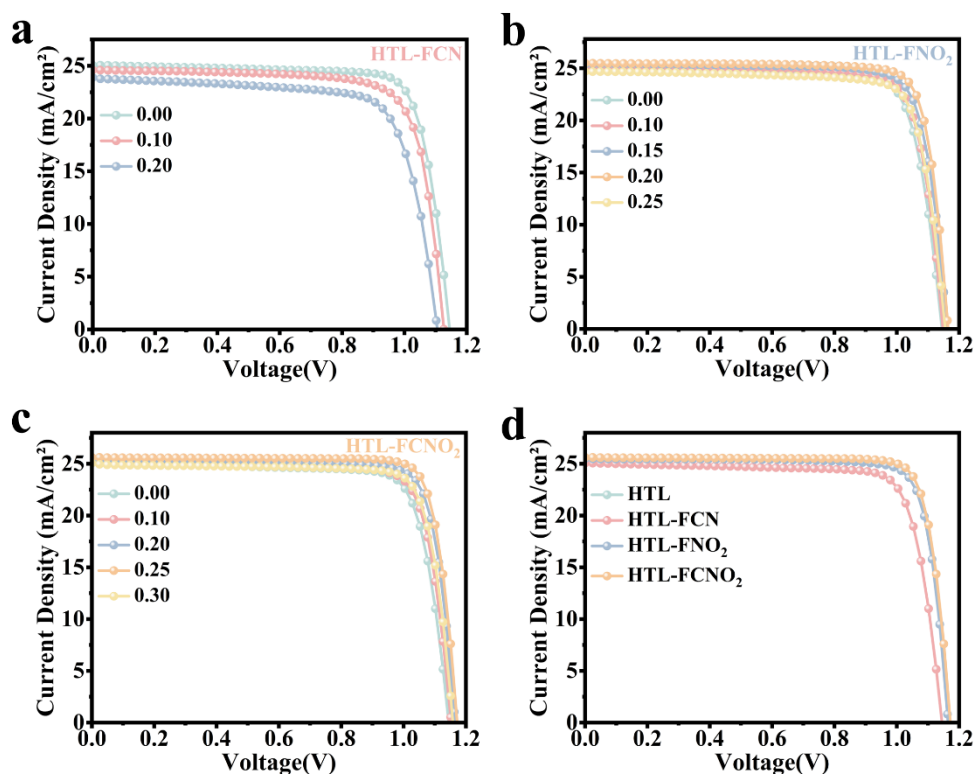

**Figure S16.** *J-V* curves of devices prepared with HTLs incorporated by different concentrations of a) FCN, b) FNO<sub>2</sub> and c) FCNO<sub>2</sub> (mg/mL). d) *J-V* curves of devices obtained from HTL incorporated with optimal concentrations of FCN, FNO<sub>2</sub> and FCNO<sub>2</sub>.

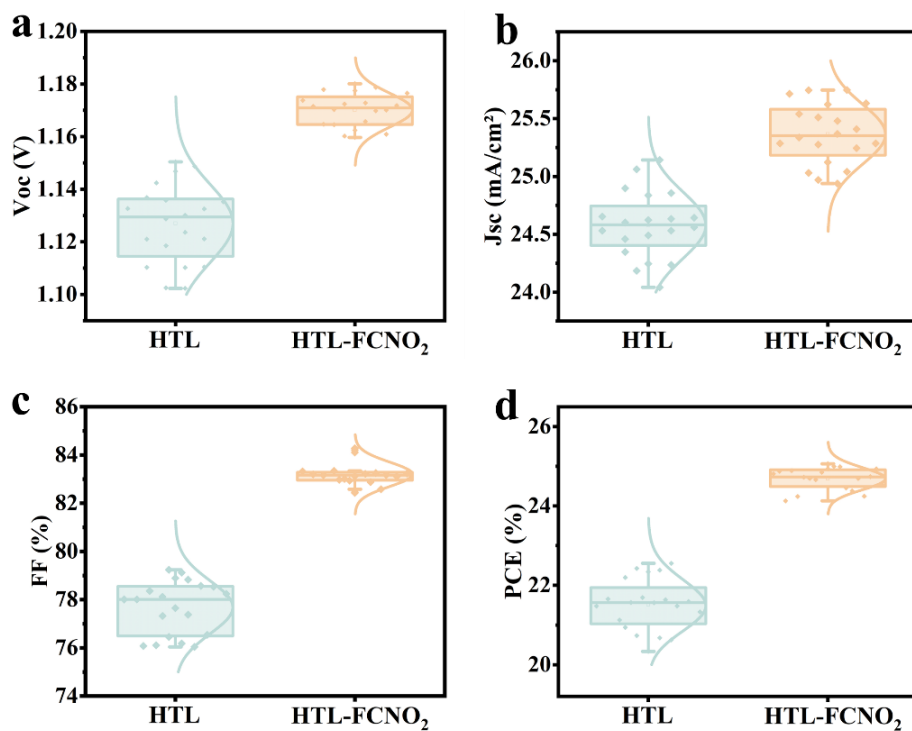

**Figure S17.** a)  $V_{oc}$ , b)  $J_{sc}$ , c) FF, and d) PCE statistical diagrams of the control device and FCNO<sub>2</sub>-incorporated device (photovoltaic parameters from 20 devices).

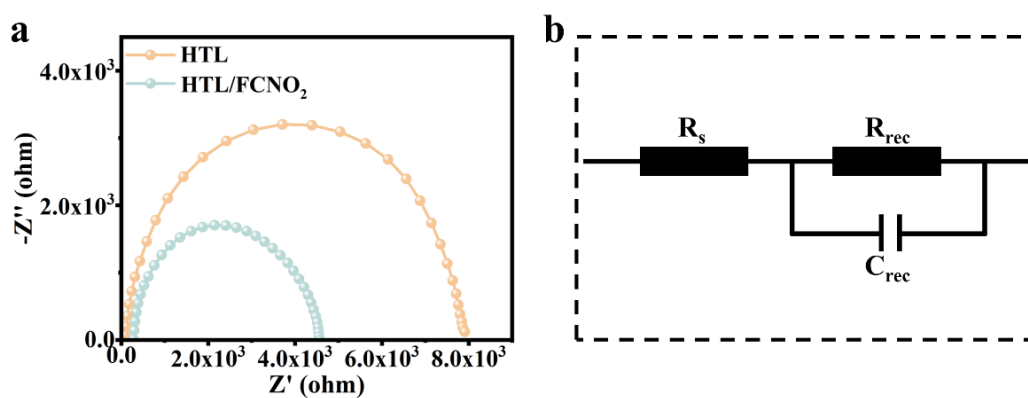

**Figure S18.** a) Nyquist plot characteristics of the control and FCNO<sub>2</sub>-incorporated devices. b) The equivalent circuit model for EIS fitting.



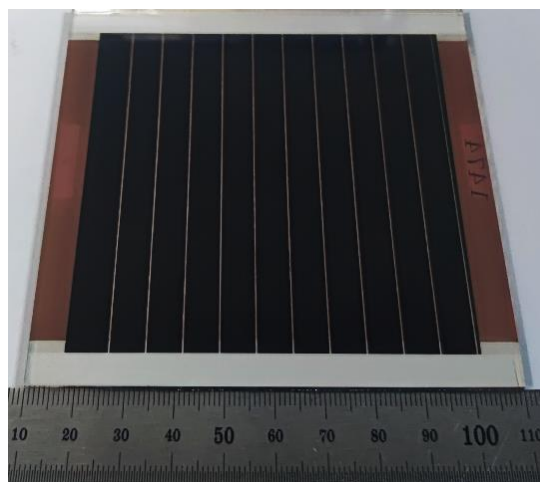

**Figure S19.** The physical picture of perovskite solar module.

## 测试报告

Test Report

报告编号: 测试字第 202406000982 号  
Report No.

防伪码  
e0d6274a3417e930  
c6498726386c5f19  
f16369d326f35b7  
0e83e02386d10f4

客户名称: University of Electronic Science and Technology of China  
Client Name  
联络信息: /  
Contact Information  
样品名称: Perovskite Solar Module  
Sample Name  
型号/规格: (10×10) cm<sup>2</sup> Perovskite Solar Module  
Model  
样品编号: Sample 156  
Sample No.  
标称生产单位: University of Electronic Science and Technology of China  
Manufacturer

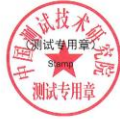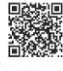

批准人: 陈满满  
Approved by

1003814138

签发日期: 2024 年 06 月 27 日  
Issue Date Year Month Day

地址: 中国·四川·成都玉双路 10 号  
Address: No. 10, Yushuang Road, Chengdu, Sichuan, China  
邮编: 610021  
Post Code  
网址: www.nimtt.cn  
Web

电话: 028-84404337  
Telephone  
传真: 028-84404149  
Fax  
邮箱: kfzx@nimtt.cn  
E-mail

第 1 页 共 5 页  
Page of

## 测试结果

Results of Test

### 1. Test Condition

- Reference Cell: Mono-Si Solar Cell (Window Material: KG1)
- Storage Condition of Sample Before Test: Temperature: 25°C; Humidity: 60%; stored 5 Days.
- Sample Information: Inverted Structured Perovskite Solar Module with an Aperture Area of 64.38cm<sup>2</sup>, and an Active Area of 57.3 cm<sup>2</sup>. The active area is defined as the aperture area minus the dead area. The dead area is 7.08 cm<sup>2</sup> measured under the optical microscope.

### 2. Methodologies and Settings

- I-V Test for Sample was conducted Using 3A Classification of Solar Simulator (Spectrum:AM1.5) calibrated to 1000 W/m<sup>2</sup> by the Reference Cell.
- Parameter Settings for I-V Test are Shown in Table 1:

Table 1 Parameter Settings for I-V Test

| Scan Mode    | Start Voltage | End Voltage | Step   | Delay | Light Soaking Pre-treatment |
|--------------|---------------|-------------|--------|-------|-----------------------------|
| Forward scan | 0 V           | 13V         | 0.05 V | no    | Yes                         |
| Reverse scan | 13 V          | 0 V         | 0.05 V | no    | Yes                         |

### 3. Test Results

Current-Voltage Curves are Shown in Figure 1 and 2.

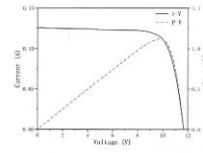

Figure 1 I-V Curve (Forward Scan)

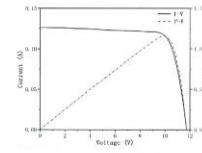

Figure 2 I-V Curve (Reverse Scan)

证书续页 (v202101)  
Continued Page

第 4 页 共 5 页  
Page of

## 测试结果

Results of Test

Irradiated I-V parameters for Perovskite Solar Cell are Shown in Table 2, Table 3:  
Table 2 Irradiated I-V parameters (Active area:57.3 cm<sup>2</sup>)

| Scan Mode    | Short-circuit Current | Open-circuit Voltage | Fill Factor | Maximum-Power | Maximum-Power Voltage | Maximum-Power Current | Conversion Efficiency |
|--------------|-----------------------|----------------------|-------------|---------------|-----------------------|-----------------------|-----------------------|
|              | $I_{sc}$ (mA)         | $V_{oc}$ (V)         | $FF$ (%)    | $P_m$ (W)     | $V_{pm}$ (V)          | $I_{pm}$ (mA)         | $\eta$ (%)            |
| Forward scan | 125.8                 | 11.67                | 76.16       | 1.118         | 9.74                  | 114.8                 | 19.5                  |
| Reverse scan | 126.3                 | 11.73                | 77.78       | 1.152         | 9.81                  | 117.5                 | 20.1                  |

Table 3 Irradiated I-V parameters (Aperture area:64.38 cm<sup>2</sup>)

| Scan Mode    | Short-circuit Current | Open-circuit Voltage | Fill Factor | Maximum-Power | Maximum-Power Voltage | Maximum-Power Current | Conversion Efficiency |
|--------------|-----------------------|----------------------|-------------|---------------|-----------------------|-----------------------|-----------------------|
|              | $I_{sc}$ (mA)         | $V_{oc}$ (V)         | $FF$ (%)    | $P_m$ (W)     | $V_{pm}$ (V)          | $I_{pm}$ (mA)         | $\eta$ (%)            |
| Forward scan | 125.8                 | 11.67                | 76.16       | 1.118         | 9.74                  | 114.8                 | 17.3                  |
| Reverse scan | 126.3                 | 11.73                | 77.78       | 1.152         | 9.81                  | 117.5                 | 17.9                  |

Remarks:  
Reported Performance Parameters Take the Average of Three Test Values.

说明  
Note

核验员: 吴伟钢  
Checked by

测试员: 廉承李  
Tested by

证书续页 (v202101)  
Continued Page

第 5 页 共 5 页  
Page of

**Figure S20.** The certified PCE of FCNO<sub>2</sub>-incorporated perovskite photovoltaic module ( $J-V$  characterization). The report is issued by NIMTT (National Institute of Measurement and

Testing Technology). The active area is 57.3 cm<sup>2</sup> measured by NIMTT.

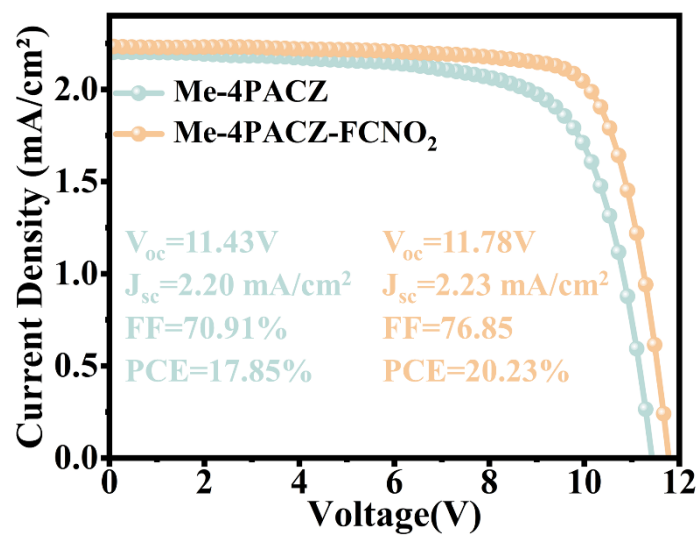

**Figure S21.** *J*-*V* curve and corresponding photovoltaic parameters of NiO<sub>x</sub>/Me-4PACZ based PSMs without and with FCNO<sub>2</sub>.

**Table S1.** The PL decay curves of perovskite films deposited on different HTLs substrates fitted by a bi-exponential decay equation of  $I(t) = I_0 + A_1 \exp(-t/\tau_1) + A_2 \exp(-t/\tau_2)$ , and average time constant ( $\tau_{ave}$ ) =  $(A_1\tau_1^2 + A_2\tau_2^2)/(A_1\tau_1 + A_2\tau_2)$ , with irradiating fluorescence incident from the glass side.

| Sample                | $\tau_1$ (ns) | $\tau_2$ (ns) | $\tau_{ave}$ (ns) |
|-----------------------|---------------|---------------|-------------------|
| HTL                   | 3.77          | 136.16        | 125.09            |
| HTL-FCN               | 3.21          | 138.52        | 129.54            |
| HTL-FNO <sub>2</sub>  | 3.05          | 100.19        | 91.51             |
| HTL-FCNO <sub>2</sub> | 1.84          | 58.87         | 52.89             |

**Table S2.** The PL decay curves of perovskite films deposited on different HTLs substrates fitted by a bi-exponential decay equation of  $I(t) = I_0 + A_1 \exp(-t/\tau_1) + A_2 \exp(-t/\tau_2)$ , and average time constant ( $\tau_{ave}$ ) =  $(A_1\tau_1^2 + A_2\tau_2^2)/(A_1\tau_1 + A_2\tau_2)$ , with irradiating fluorescence incident from the side of the perovskite film.

| Sample                | $\tau_1$ (ns) | $\tau_2$ (ns) | $\tau_{ave}$ (ns) |
|-----------------------|---------------|---------------|-------------------|
| HTL                   | 15.17         | 321.89        | 285.72            |
| HTL-FCN               | 15.01         | 438.70        | 390.50            |
| HTL-FNO <sub>2</sub>  | 17.43         | 568.52        | 524.83            |
| HTL-FCNO <sub>2</sub> | 18.71         | 656.26        | 606.08            |

**Table S3.** Photovoltaic parameters of PSCs based on unmodified HTL, optimal concentrations of FCN, FNO<sub>2</sub> and FCNO<sub>2</sub>-incorporated HTL.

| Device                | $V_{oc}$ [V] | $J_{sc}$ [mA/cm <sup>2</sup> ] | FF    | PCE[%] |
|-----------------------|--------------|--------------------------------|-------|--------|
| HTL                   | 1.14         | 25.06                          | 78.74 | 22.50  |
| HTL-FCN               | 1.14         | 25.06                          | 78.74 | 22.50  |
| HTL-FNO <sub>2</sub>  | 1.16         | 25.49                          | 82.17 | 24.30  |
| HTL-FCNO <sub>2</sub> | 1.17         | 25.62                          | 83.23 | 25.01  |

**Table S4.** Photovoltaic parameters extracting from  $J$ - $V$  curves for the best-performing NiO<sub>x</sub>/PTAA-based inverted control and FCNO<sub>2</sub>-incorporated devices

| Device                | Scan | $V_{oc}$ [V] | $J_{sc}$ [mA/cm <sup>2</sup> ] | FF    | PCE[%] | HI    |
|-----------------------|------|--------------|--------------------------------|-------|--------|-------|
| Control               | FS   | 1.141        | 25.08                          | 73.34 | 20.96  | 0.068 |
|                       | RS   | 1.142        | 25.06                          | 78.74 | 22.50  |       |
| HTL-FCNO <sub>2</sub> | FS   | 1.170        | 25.55                          | 82.72 | 24.72  | 0.012 |
|                       | RS   | 1.173        | 25.62                          | 83.23 | 25.01  |       |

**Table S5.** Summary of photovoltaic performance of reported high-efficiency invertedPSMs up to now. (active area over 50 cm<sup>2</sup>)

| Device structure                                                                       | active area<br>(cm <sup>2</sup> ) | PCE<br>[%]  | Certified<br>PCE (%) | Ref.                                                   |
|----------------------------------------------------------------------------------------|-----------------------------------|-------------|----------------------|--------------------------------------------------------|
| <b>FTO/NiO<sub>x</sub>/FCNO<sub>2</sub>-<br/>PTAA/Perovskite/C<sub>60</sub>/BCP/Cu</b> | <b>57.3</b>                       | <b>20.6</b> | <b>20.1</b>          | <b>This work</b>                                       |
| FTO/NiO <sub>x</sub> /Perovskite-<br>urea/C <sub>60</sub> /BCP/Cu                      | 61.56                             | 20.56       | –                    | Nano-Micro Lett,<br>2024, 16:190                       |
| ITO/NiO <sub>x</sub> /PEAI/Perovskite/DMA<br>TFA/PCBM/BCP/Ag                           | 63.74                             | 20.58       | –                    | Adv. Mater, 2024, 36,<br>2313860                       |
| ITO/PTAA/Perovskite-Zn-<br>additives/C <sub>60</sub> /BCP/Ag                           | 79.67                             | 19.97       | 19.60                | Nat. Commun, 2024,<br>15:13551                         |
| FTO/NiO <sub>x</sub> /Perovskite-L-<br>AA/C <sub>60</sub> /BCP/Cu                      | 57.3                              | 19.17       | –                    | ACS Appl. Mater.<br>Interfaces, 2024, 16,<br>4751-4762 |
| ITO/Urea-NiO <sub>x</sub> /Perovskite/<br>BzMIMBr/C <sub>60</sub> /BCP/Cu              | 178.4                             | 17.18       | –                    | Adv. Funct. Mater.<br>2023, 33, 2214774                |
| FTO/NiO <sub>x</sub> with SRE/Perovskite/<br>PC <sub>61</sub> BM/BCP/Ag                | 174                               | 18.6        | –                    | Joule, 2022, 6, 1931-<br>1943                          |
| ITO/PTAA/Perovskite<br>/C <sub>60</sub> /BCP/Cu                                        | 50.1                              | 19.7        | 19.15                | Science, 2021, 373,<br>902-907                         |
